# Supplementary material for: Analyzing the epidemiological trends of cardiovascular diseases in China from 1990 to 2021 and predicting future statistics based on GBD data
Source: Research Square preprint supplement (doi:10.21203/rs.3.rs-5700163/v1), 2025-04-17
Supplement: Supplementary file 1 [file 74d54f6665071237476b7774.pdf]

# Supplementary Material

## Contents

|                                                      |    |
|------------------------------------------------------|----|
| 1 Predict the total ASIR based on ARIMA model .....  | 1  |
| 2 Predict the male ASIR based on ARIMA model .....   | 5  |
| 3 Predict the female ASIR based on ARIMA model ..... | 9  |
| 4 Predict the total ASPR based on ARIMA model .....  | 13 |
| 5 Predict the male ASPR based on ARIMA model .....   | 17 |
| 6 Predict the female ASPR based on ARIMA model ..... | 21 |
| 7 Predict the total ASMR based on ARIMA model .....  | 25 |
| 8 Predict the male ASMR based on ARIMA model .....   | 29 |
| 9 Predict the female ASMR based on ARIMA model ..... | 33 |

**Note: All ARIMA models were constructed by R version 4.1.0**

# 1 Predict the total ASIR based on ARIMA model

## 1.1 Total ASIR time-series plot

The total ASIR trend from 1990 to 2021 was showed in figure 1-1.

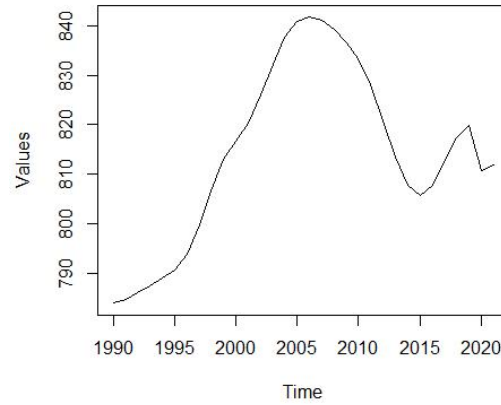

Figure 1-1 Total ASIR time-series trend plot

## 1.2 Difference of time-series

Figure 1-2 showed the first order difference of total ASIR time-series. Obviously, it was not stationary. After performing the second order difference (Figure 1-3), we found that the time-series was stationary (Figure 1-4, *adf.test*).

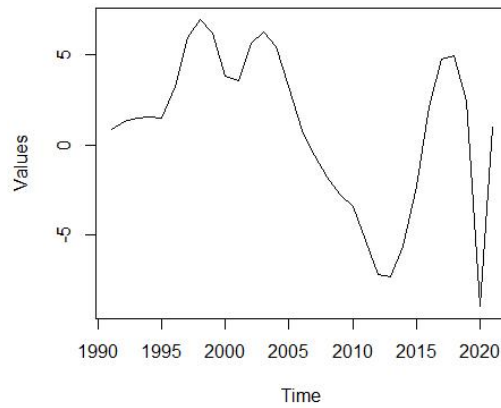

Figure 1-2 The first order difference of total ASIR time-series

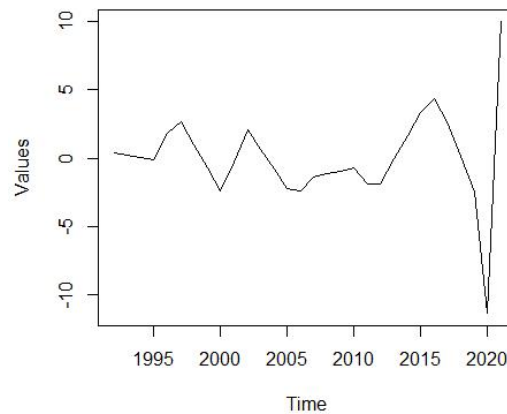

Figure 1-3 The second order difference of total ASIR time-series

```

Augmented Dickey-Fuller Test
alternative: stationary

Type 1: no drift no trend
lag ADF p.value
[1,] 0 -4.92 0.01
[2,] 1 -3.27 0.01
[3,] 2 -4.21 0.01
[4,] 3 -3.00 0.01
Type 2: with drift no trend
lag ADF p.value
[1,] 0 -4.81 0.0100
[2,] 1 -3.21 0.0331
[3,] 2 -4.12 0.0100
[4,] 3 -2.93 0.0570
Type 3: with drift and trend
lag ADF p.value
[1,] 0 -4.61 0.0100
[2,] 1 -3.14 0.1330
[3,] 2 -4.03 0.0212
[4,] 3 -2.86 0.2352
----
Note: in fact, p.value = 0.01 means p.value <= 0.01

```

Figure 1-4 Time-series stationarity test after the second order difference

### 1.3 White noise test and draw ACF and PACF plots

We used “Box-Ljung” method to perform white noise test. White noise test results showed  $P$  values were 0.9214 for “lag=6” and 0.9926 for “lag=12” (Figure 1-5). We drew ACF and PACF plots for stationary time-series (Figure 1-6 and Figure 1-7).

```

> Box.test(values_diff,lag=6,type='Ljung-Box')

Box-Ljung test

data: values_diff
x-squared = 1.9811, df = 6, p-value = 0.9214

> Box.test(values_diff,lag=12,type='Ljung-Box')

Box-Ljung test

data: values_diff
x-squared = 3.3432, df = 12, p-value = 0.9926

```

Figure 1-5 White noise test for stationary time-series

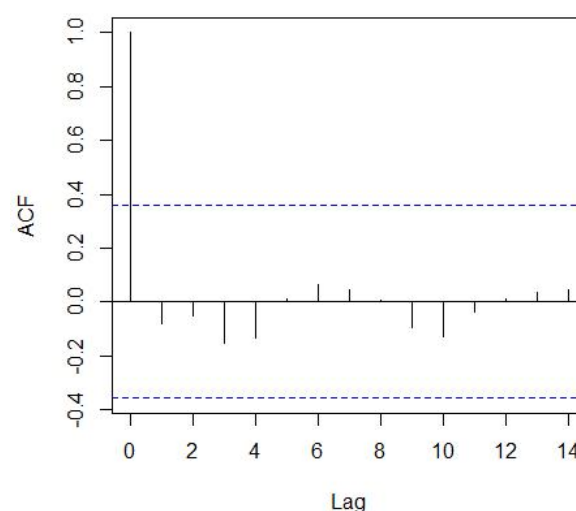

Figure 1-6 ACF plot for stationary time-series

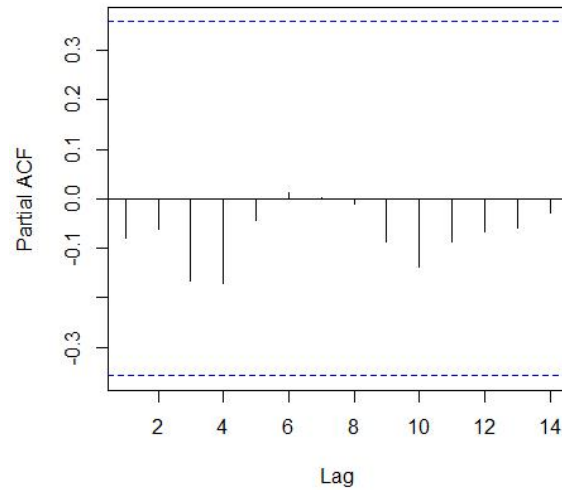

Figure 1-7 PACF plot for stationary time-series

#### 1.4 ARIMA model constructing

In the section 1.3, we found that the stationary time-series may be a white noise sequence. In theory, the white noise sequence may not be suitable for fitting models. However, due to the actual data are complex and various, it's very difficult to ensure that all the data used for modeling is perfect and flawless. Therefore, we still considered using these data to construct ARIMA models for prediction. We selected optimal ARIMA parameters ( $p$ ,  $d$ ,  $q$ ) based on Akaike information criterion (AIC) and Bayesian information criterion (BIC). The results of selecting ARIMA parameters were showed in table 1-1.

Table 1-1 The results of selecting ARIMA parameters

| Models       | AIC      | BIC      |
|--------------|----------|----------|
| ARIMA(1,2,0) | 160.0562 | 162.8586 |
| ARIMA(1,2,1) | 159.5873 | 163.7909 |
| ARIMA(1,2,2) | 161.5301 | 167.1349 |
| ARIMA(2,2,0) | 161.9855 | 166.1891 |
| ARIMA(2,2,1) | 161.5195 | 167.1243 |
| ARIMA(2,2,2) | -        | -        |

From table 1-1, we observed that there was lower AIC and BIC in ARIMA(1,2,1) model. Therefore, we chose ARIMA(1,2,1) model to fit the total ASIR data.

#### 1.5 White noise test for residual

From figure 1-8, we found that residuals were white noise sequence (All  $P > 0.05$ , Bottom Left). Therefore, the ARIMA(1,2,1) model was successful and reliable.

### Residual Diagnostics Plots

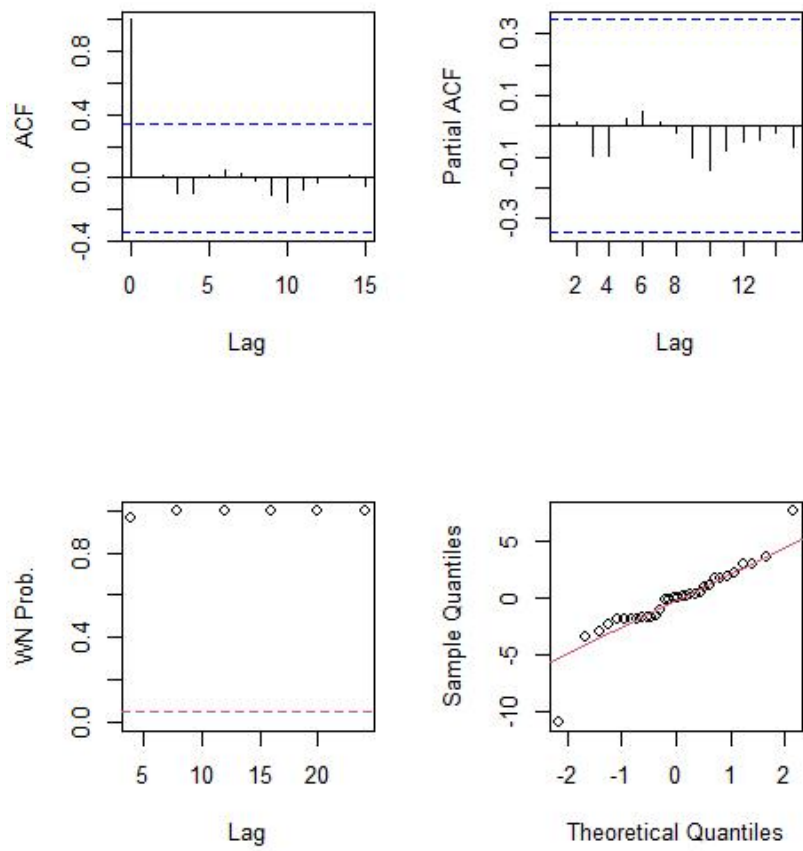

Figure 1-8 ARIMA(1,2,1) model test

## 2 Predict the male ASIR based on ARIMA model

### 2.1 Male ASIR time-series plot

The male ASIR trend from 1990 to 2021 was showed in figure 2-1.

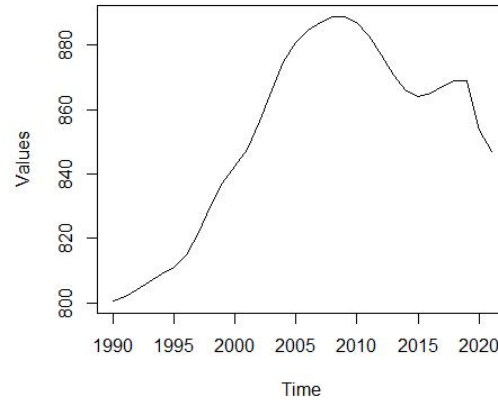

Figure 2-1 Male ASIR time-series trend plot

### 2.2 Difference of time-series

Figure 2-2 showed the first order difference of male ASIR time-series. Obviously, it was not stationary. After performing the second order difference (Figure 2-3), we found that the time-series was stationary (Figure 2-4, *adf.test*).

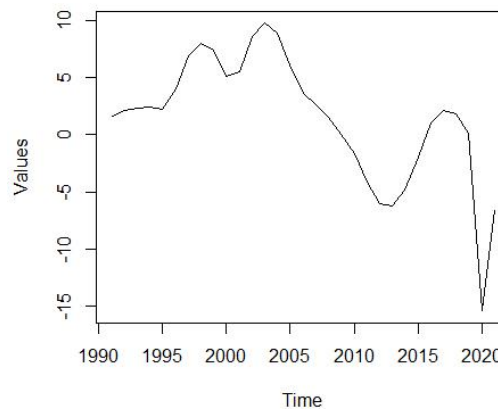

Figure 2-2 The first order difference of male ASIR time-series

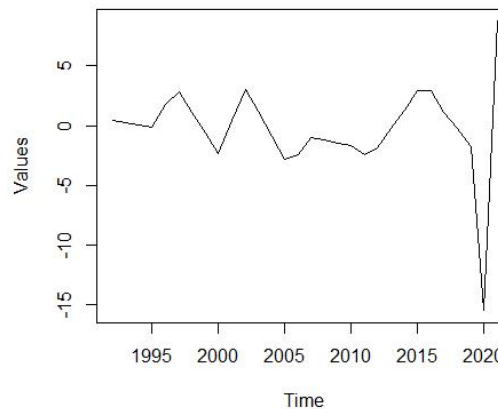

Figure 2-3 The second order difference of male ASIR time-series

```

Augmented Dickey-Fuller Test
alternative: stationary

Type 1: no drift no trend
lag ADF p.value
[1,] 0 -5.64 0.0100
[2,] 1 -2.58 0.0125
[3,] 2 -3.25 0.0100
[4,] 3 -2.61 0.0112
Type 2: with drift no trend
lag ADF p.value
[1,] 0 -5.59 0.0100
[2,] 1 -2.57 0.1233
[3,] 2 -3.26 0.0292
[4,] 3 -2.62 0.1033
Type 3: with drift and trend
lag ADF p.value
[1,] 0 -5.61 0.0100
[2,] 1 -2.67 0.3060
[3,] 2 -3.47 0.0655
[4,] 3 -2.87 0.2339
-----
Note: in fact, p.value = 0.01 means p.value <= 0.01

```

Figure 2-4 Time-series stationarity test after the second order difference

### 2.3 White noise test and draw ACF and PACF plots

We used “Box-Ljung” method to perform white noise test. White noise test results showed  $P$  values were 0.9388 for “lag=6” and 0.9994 for “lag=12” (Figure 2-5). We drew ACF and PACF plots for stationary time-series (Figure 2-6 and Figure 2-7).

```

> Box.test(values_diff,lag=6,type='Ljung-Box')

Box-Ljung test

data: values_diff
X-squared = 1.7792, df = 6, p-value = 0.9388

> Box.test(values_diff,lag=12,type='Ljung-Box')

Box-Ljung test

data: values_diff
X-squared = 1.978, df = 12, p-value = 0.9994

```

Figure 2-5 White noise test for stationary time-series

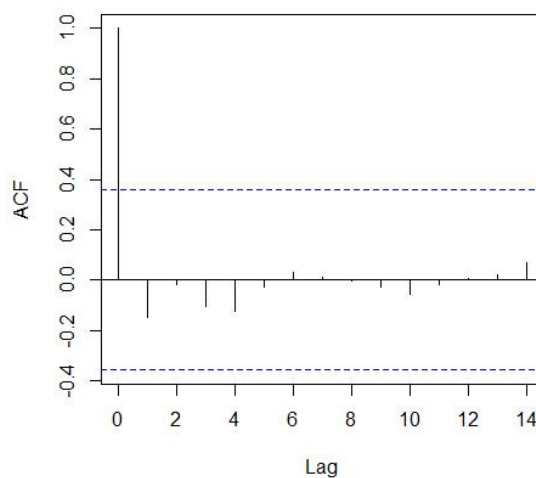

Figure 2-6 ACF plot for stationary time-series

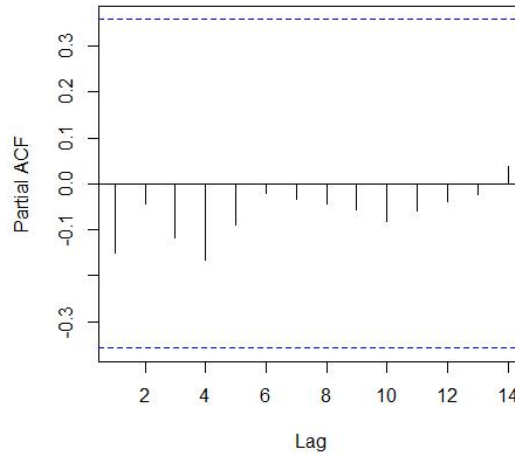

Figure 2-7 PACF plot for stationary time-series

## 2.4 ARIMA model constructing

We selected optimal ARIMA parameters ( $p, d, q$ ) based on Akaike information criterion (AIC) and Bayesian information criterion (BIC). The results of selecting ARIMA parameters were showed in table 2-1.

Table 2-1 The results of selecting ARIMA parameters

| Models       | AIC      | BIC      |
|--------------|----------|----------|
| ARIMA(1,2,0) | 166.3027 | 169.1051 |
| ARIMA(1,2,1) | 167.4590 | 171.6626 |
| ARIMA(1,2,2) | 169.4553 | 175.0601 |
| ARIMA(2,2,0) | 168.2750 | 172.4786 |
| ARIMA(2,2,1) | -        | -        |
| ARIMA(2,2,2) | 171.3930 | 178.3990 |

From table 2-1, we observed that there was lower AIC and BIC in ARIMA(1,2,0) model. Therefore, we chose ARIMA(1,2,0) model to fit the male ASIR data.

## 2.5 White noise test for residual

From figure 2-8, we found that residuals were white noise sequence (All  $P > 0.05$ , Bottom Left). Therefore, the ARIMA(1,2,0) model was successful and reliable.



### Residual Diagnostics Plots

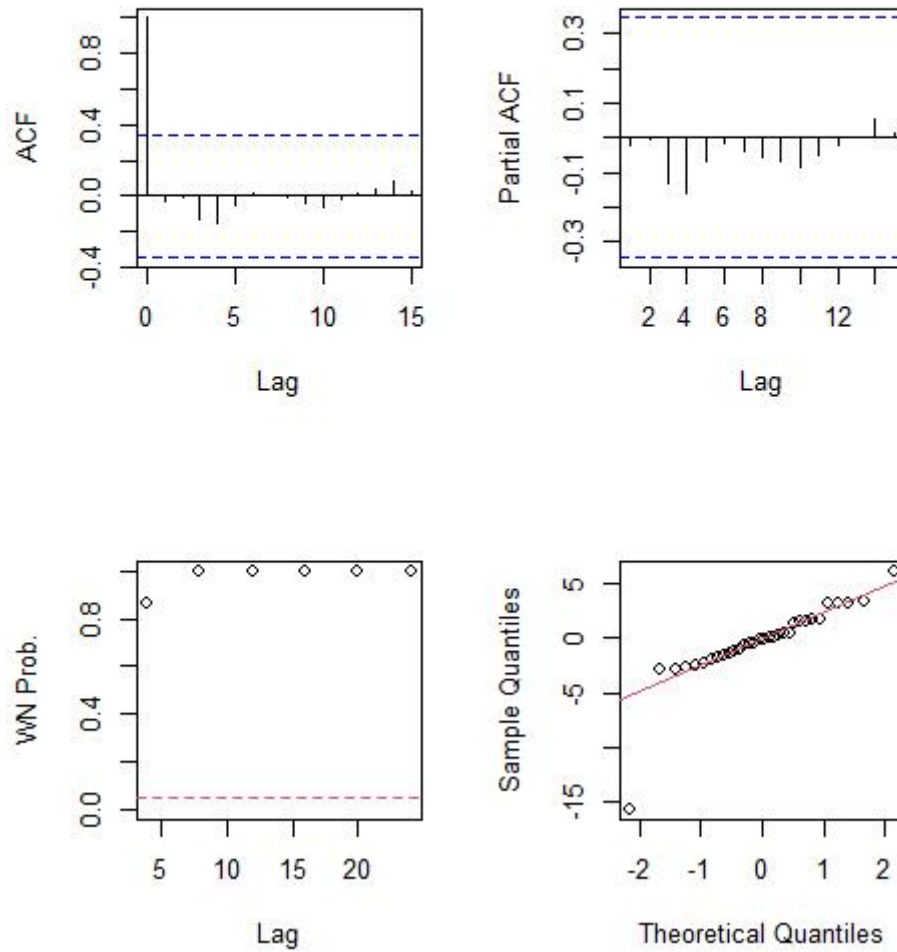

Figure 2-8 ARIMA(1,2,0) model test

### 3 Predict the female ASIR based on ARIMA model

#### 3.1 Female ASIR time-series plot

The female ASIR trend from 1990 to 2021 was showed in figure 3-1.

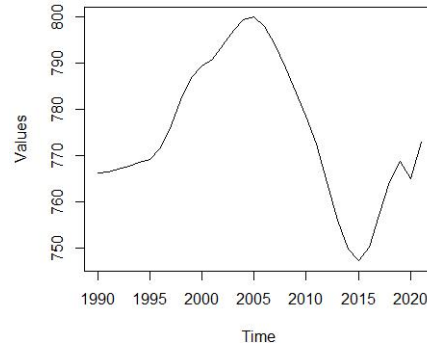

Figure 3-1 Female ASIR time-series trend plot

#### 3.2 Difference of time-series

Figure 3-2 showed the first order difference of female ASIR time-series. Obviously, it was not stationary. After performing the second order difference (Figure 3-3), we found that the time-series was stationary (Figure 3-4, *adf.test*).

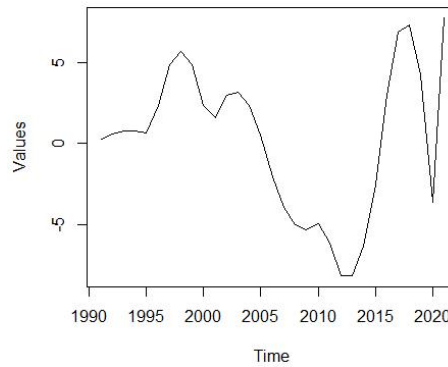

Figure 3-2 The first order difference of female ASIR time-series

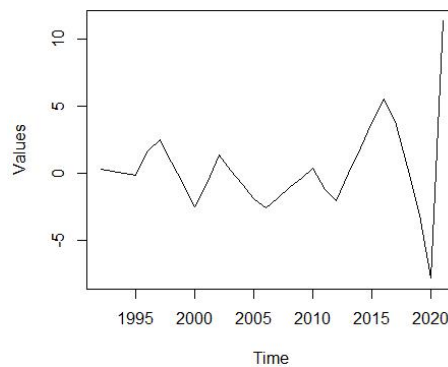

Figure 3-3 The second order difference of female ASIR time-series

```

Augmented Dickey-Fuller Test
alternative: stationary

Type 1: no drift no trend
lag ADF p.value
[1,] 0 -3.81 0.0100
[2,] 1 -3.76 0.0100
[3,] 2 -3.25 0.0100
[4,] 3 -1.87 0.0614
Type 2: with drift no trend
lag ADF p.value
[1,] 0 -3.73 0.0100
[2,] 1 -3.73 0.0100
[3,] 2 -3.23 0.0313
[4,] 3 -1.86 0.3795
Type 3: with drift and trend
lag ADF p.value
[1,] 0 -3.62 0.0471
[2,] 1 -3.88 0.0282
[3,] 2 -3.41 0.0742
[4,] 3 -2.07 0.5302
-----
Note: in fact, p.value = 0.01 means p.value <= 0.01

```

Figure 3-4 Time-series stationarity test after the second order difference

### 3.3 White noise test and draw ACF and PACF plots

We used “Box-Ljung” method to perform white noise test. White noise test results showed  $P$  values were 0.8461 for “lag=6” and 0.9024 for “lag=12” (Figure 3-5). We drew ACF and PACF plots for stationary time-series (Figure 3-6 and Figure 3-7).

```

> Box.test(values_diff,lag=6,type='Ljung-Box')

Box-Ljung test

data: values_diff
X-squared = 2.6943, df = 6, p-value = 0.8461

> Box.test(values_diff,lag=12,type='Ljung-Box')

Box-Ljung test

data: values_diff
X-squared = 6.26, df = 12, p-value = 0.9024

```

Figure 3-5 White noise test for stationary time-series

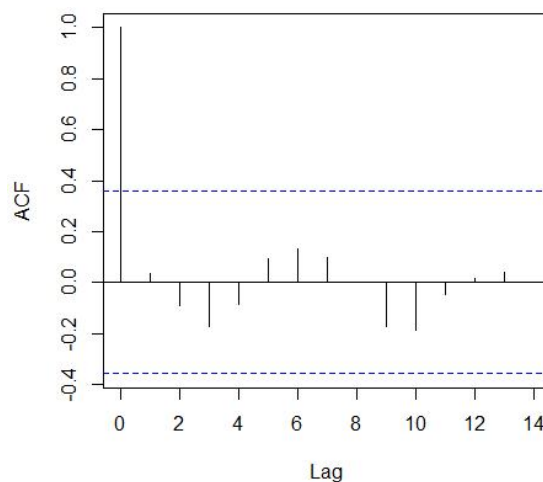

Figure 3-6 ACF plot for stationary time-series

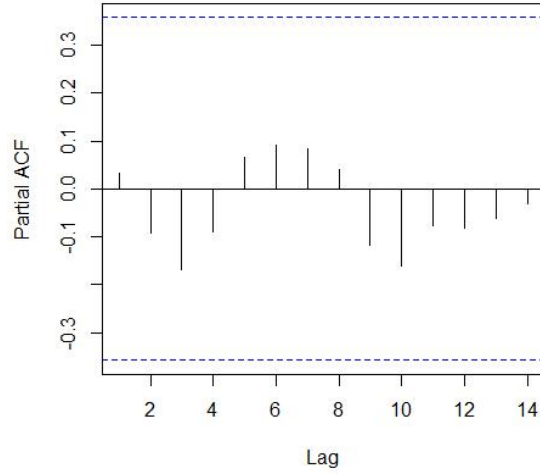

Figure 3-7 PACF plot for stationary time-series

### 3.4 ARIMA model constructing

We selected optimal ARIMA parameters ( $p, d, q$ ) based on Akaike information criterion (AIC) and Bayesian information criterion (BIC). The results of selecting ARIMA parameters were showed in table 3-1.

Table 3-1 The results of selecting ARIMA parameters

| Models       | AIC      | BIC      |
|--------------|----------|----------|
| ARIMA(1,2,0) | 158.5276 | 161.3300 |
| ARIMA(1,2,1) | 160.4107 | 164.6143 |
| ARIMA(1,2,2) | 161.5719 | 167.1767 |
| ARIMA(2,2,0) | 159.3101 | 163.5137 |
| ARIMA(2,2,1) | 161.0241 | 166.6289 |
| ARIMA(2,2,2) | 159.9508 | 166.9568 |

From table 3-1, we observed that there was lower AIC and BIC in ARIMA(1,2,0) model. Therefore, we chose ARIMA(1,2,0) model to fit the female ASIR data.

### 3.5 White noise test for residual

From figure 3-8, we found that residuals were white noise sequence (All  $P > 0.05$ , Bottom Left). Therefore, the ARIMA(1,2,0) model was successful and reliable.

### Residual Diagnostics Plots

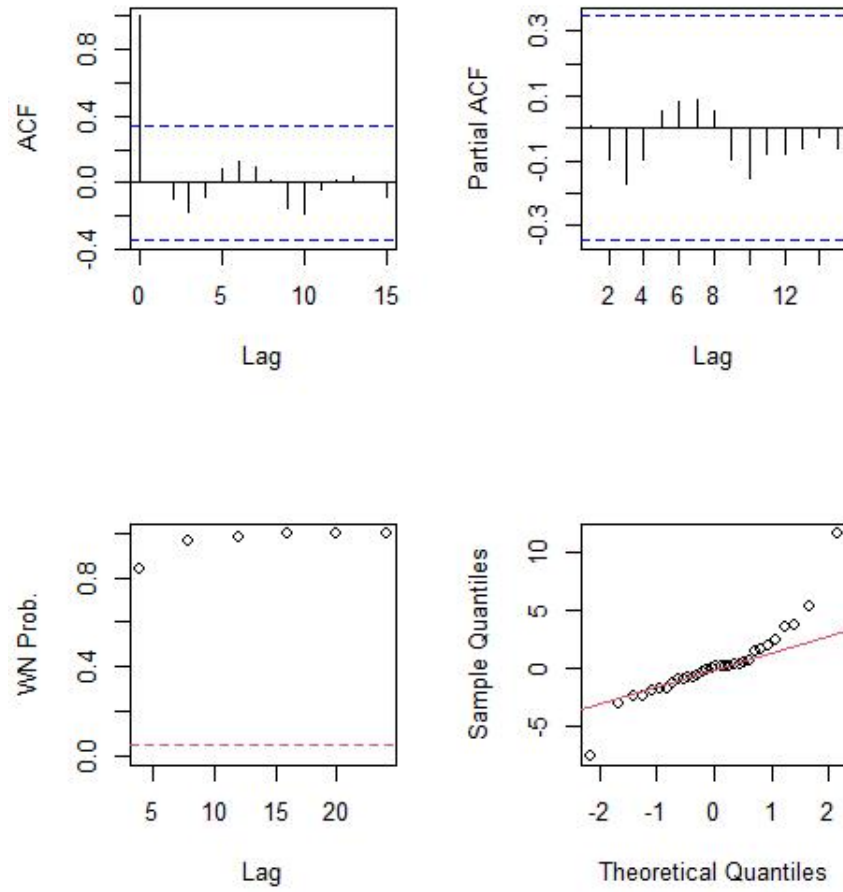

Figure 3-8 ARIMA(1,2,0) model test

## 4 Predict the total ASPR based on ARIMA model

### 4.1 Total ASPR time-series plot

The total ASPR trend from 1990 to 2021 was showed in figure 4-1.

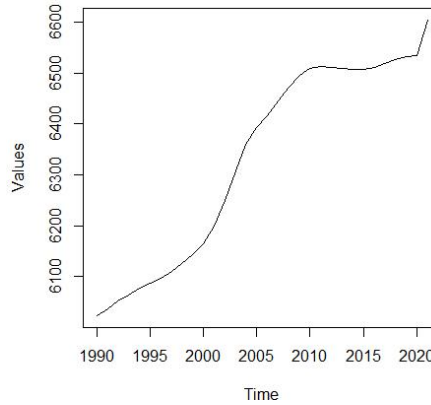

Figure 4-1 Total ASPR time-series trend plot

### 4.2 Difference of time-series

Figure 4-2 showed the first order difference of total ASPR time-series. Obviously, it was not stationary. After performing the second order difference (Figure 4-3), we found that the time-series was not still stationary (Figure 4-4, *adf.test*). Actual data are often complex and various. Therefore, we selected optimal ARIMA parameters ( $p, d, q$ ) based on AIC and BIC.

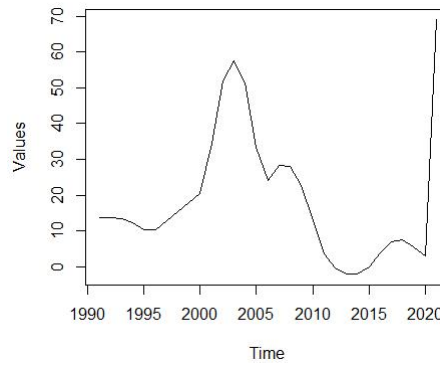

Figure 4-2 The first order difference of total ASPR time-series

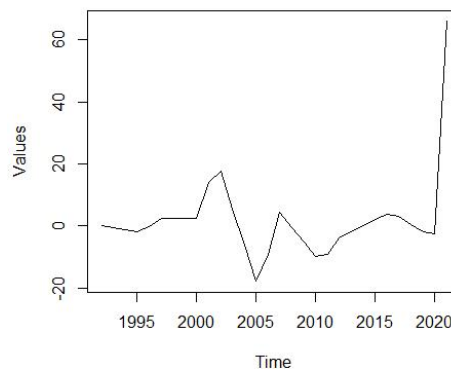

Figure 4-3 The second order difference of total ASPR time-series

```

Augmented Dickey-Fuller Test
alternative: stationary

Type 1: no drift no trend
lag ADF p.value
[1,] 0 -1.317 0.2009
[2,] 1 -1.744 0.0795
[3,] 2 -0.885 0.3539
[4,] 3 -0.576 0.4635
Type 2: with drift no trend
lag ADF p.value
[1,] 0 -1.262 0.594
[2,] 1 -1.686 0.445
[3,] 2 -0.823 0.746
[4,] 3 -0.510 0.854
Type 3: with drift and trend
lag ADF p.value
[1,] 0 -1.048 0.915
[2,] 1 -1.460 0.775
[3,] 2 -0.493 0.976
[4,] 3 -0.103 0.990
----
Note: in fact, p.value = 0.01 means p.value <= 0.01

```

Figure 4-4 Time-series stationarity test after the second order difference

### 4.3 White noise test and draw ACF and PACF plots

We used “Box-Ljung” method to perform white noise test. White noise test results showed  $P$  values were 0.9903 for “lag=6” and 0.9810 for “lag=12” (Figure 4-5). We drew ACF and PACF plots for time-series (Figure 4-6 and Figure 4-7).

```

> Box.test(values_diff,lag=6,type='Ljung-Box')

Box-Ljung test

data: values_diff
X-squared = 0.86063, df = 6, p-value = 0.9903

> Box.test(values_diff,lag=12,type='Ljung-Box')

Box-Ljung test

data: values_diff
X-squared = 4.1305, df = 12, p-value = 0.981

```

Figure 4-5 White noise test for time-series

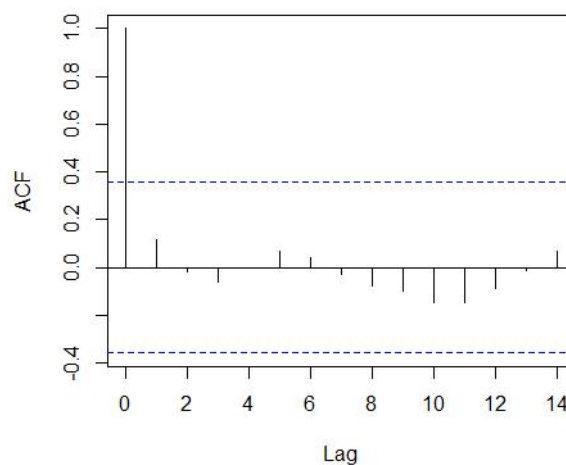

Figure 4-6 ACF plot for time-series

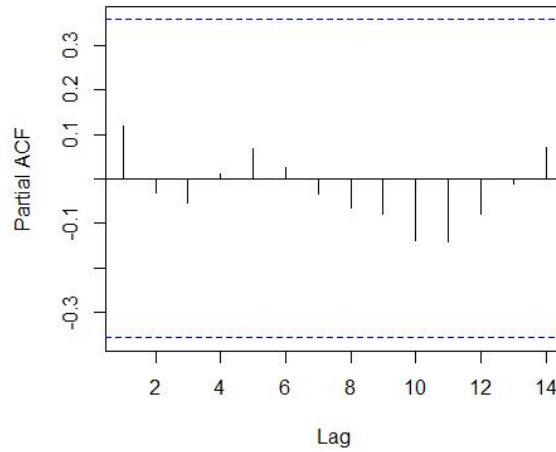

Figure 4-7 PACF plot for time-series

#### 4.4 ARIMA model constructing

We selected optimal ARIMA parameters ( $p, d, q$ ) based on Akaike information criterion (AIC) and Bayesian information criterion (BIC). The results of selecting ARIMA parameters were showed in table 4-1.

Table 4-1 The results of selecting ARIMA parameters

| Models       | AIC      | BIC      |
|--------------|----------|----------|
| ARIMA(1,2,0) | 244.7780 | 247.5804 |
| ARIMA(1,2,1) | 245.8039 | 250.0075 |
| ARIMA(1,2,2) | 247.7949 | 253.3997 |
| ARIMA(2,2,0) | 245.5806 | 249.7842 |
| ARIMA(2,2,1) | 247.5281 | 253.1329 |
| ARIMA(2,2,2) | 249.4055 | 256.4115 |

From table 4-1, we observed that there was lower AIC and BIC in ARIMA(1,2,0) model. Therefore, we chose ARIMA(1,2,0) model to fit the total ASPR data.

#### 4.5 White noise test for residual

From figure 4-8, we found that residuals were white noise sequence (All  $P > 0.05$ , Bottom Left). Therefore, the ARIMA(1,2,0) model was successful and reliable.



### Residual Diagnostics Plots

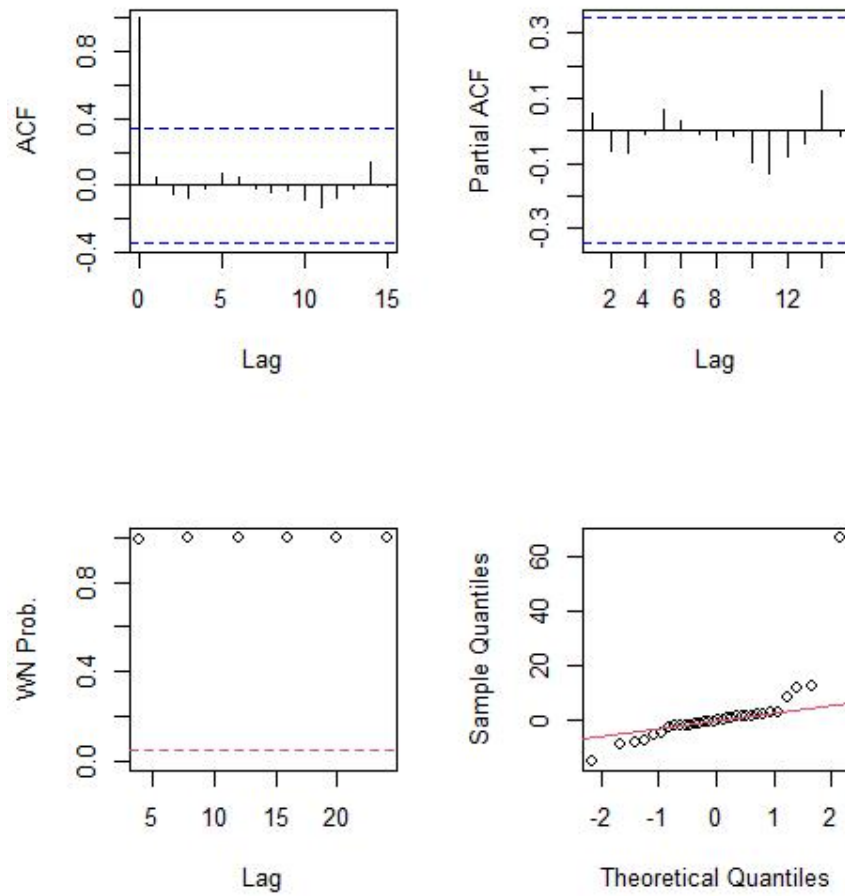

Figure 4-8 ARIMA(1,2,0) model test

## 5 Predict the male ASPR based on ARIMA model

### 5.1 Male ASPR time-series plot

The male ASPR trend from 1990 to 2021 was showed in figure 5-1.

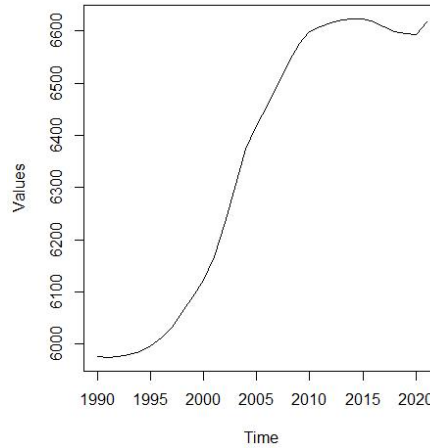

Figure 5-1 Male ASPR time-series trend plot

### 5.2 Difference of time-series

Figure 5-2 showed the first order difference of male ASPR time-series. Obviously, it was not stationary. After performing the second order difference (Figure 5-3), we found that the time-series was not still stationary (Figure 5-4, *adf.test*). We selected optimal ARIMA parameters ( $p$ ,  $d$ ,  $q$ ) based on AIC and BIC.

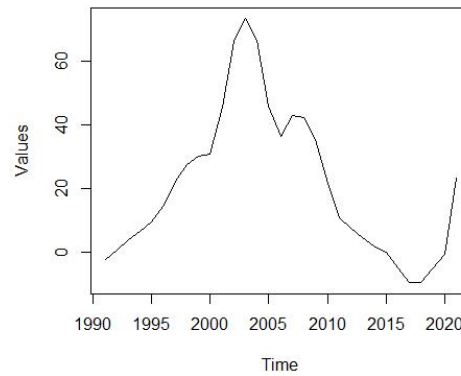

Figure 5-2 The first order difference of male ASPR time-series

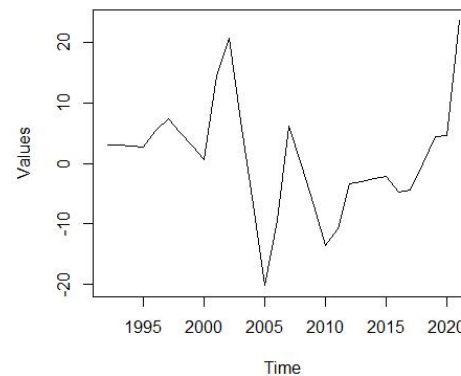

Figure 5-3 The second order difference of male ASPR time-series

```

Augmented Dickey-Fuller Test
alternative: stationary

Type 1: no drift no trend
      lag   ADF p.value
[1,]    0  -1.89  0.0584
[2,]    1  -3.04  0.0100
[3,]    2  -1.50  0.1364
[4,]    3  -1.10  0.2779
Type 2: with drift no trend
      lag   ADF p.value
[1,]    0  -1.87  0.3774
[2,]    1  -2.99  0.0495
[3,]    2  -1.46  0.5270
[4,]    3  -1.05  0.6663
Type 3: with drift and trend
      lag   ADF p.value
[1,]    0  -1.575 0.728
[2,]    1  -2.714 0.290
[3,]    2  -0.872 0.942
[4,]    3  -0.254 0.986
----
Note: in fact, p.value = 0.01 means p.value <= 0.01

```

Figure 5-4 Time-series stationarity test after the second order difference

### 5.3 White noise test and draw ACF and PACF plots

We used “Box-Ljung” method to perform white noise test. White noise test results showed  $P$  values were 0.0204 for “lag=6” and 0.0152 for “lag=12” (Figure 5-5). We drew ACF and PACF plots for time-series (Figure 5-6 and Figure 5-7).

```

> Box.test(values_diff,lag=6,type='Ljung-Box')

Box-Ljung test

data:  values_diff
x-squared = 14.978, df = 6, p-value = 0.02043

> Box.test(values_diff,lag=12,type='Ljung-Box')

Box-Ljung test

data:  values_diff
x-squared = 24.927, df = 12, p-value = 0.01517

```

Figure 5-5 White noise test for time-series

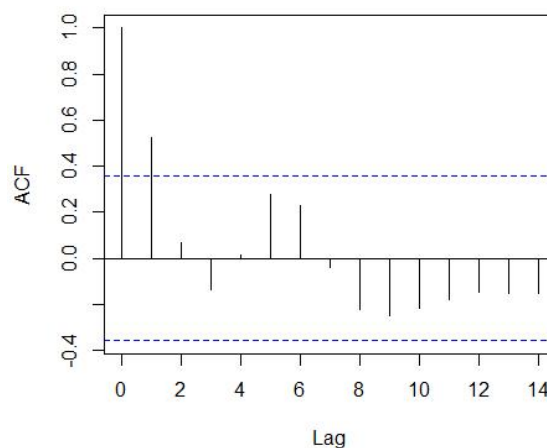

Figure 5-6 ACF plot for time-series

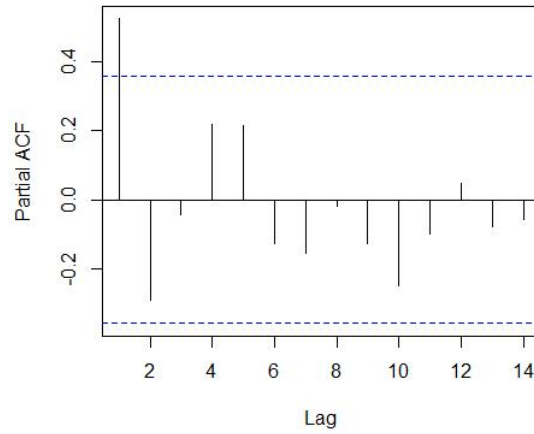

Figure 5-7 PACF plot for time-series

#### 5.4 ARIMA model constructing

We selected optimal ARIMA parameters (p, d, q) based on Akaike information criterion (AIC) and Bayesian information criterion (BIC). The results of selecting ARIMA parameters were showed in table 5-1.

Table 5-1 The results of selecting ARIMA parameters

| Models       | AIC      | BIC      |
|--------------|----------|----------|
| ARIMA(1,2,0) | 208.8581 | 211.6605 |
| ARIMA(1,2,1) | 202.3354 | 206.5390 |
| ARIMA(1,2,2) | 204.2162 | 209.8210 |
| ARIMA(2,2,0) | 204.1165 | 208.3200 |
| ARIMA(2,2,1) | 204.1129 | 209.7177 |
| ARIMA(2,2,2) | 206.0342 | 213.0402 |

From table 5-1, we observed that there was lower AIC and BIC in ARIMA(1,2,1) model. Therefore, we chose ARIMA(1,2,1) model to fit the male ASPR data.

#### 5.5 White noise test for residual

From figure 5-8, we found that residuals were white noise sequence (All  $P > 0.05$ , Bottom Left). Therefore, the ARIMA(1,2,1) model was successful and reliable.

### Residual Diagnostics Plots

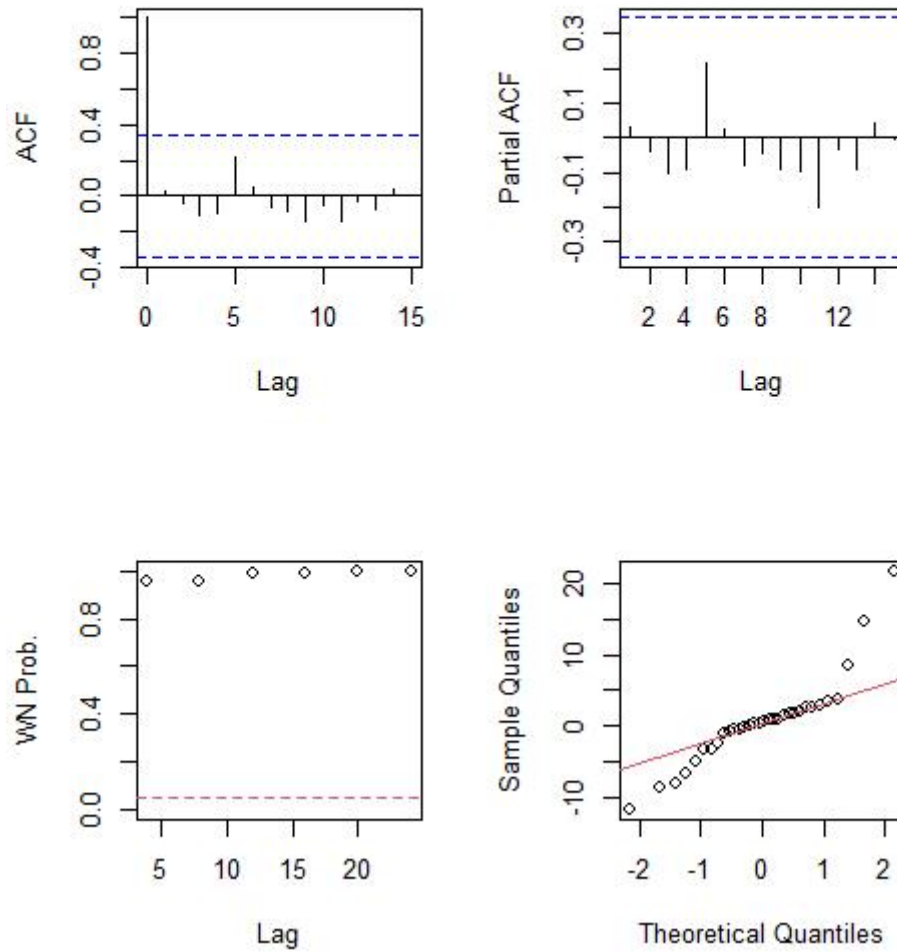

Figure 5-8 ARIMA(1,2,1) model test

## 6 Predict the female ASPR based on ARIMA model

### 6.1 Female ASPR time-series plot

The female ASPR trend from 1990 to 2021 was showed in figure 6-1.

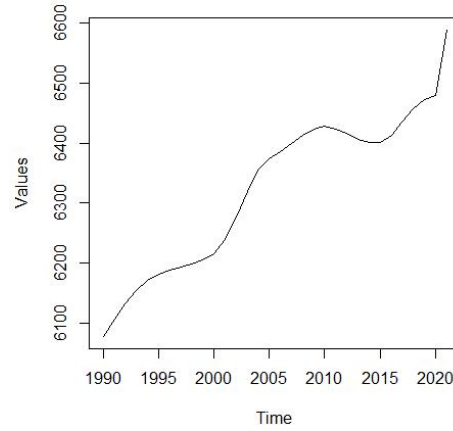

Figure 6-1 Female ASPR time-series trend plot

### 6.2 Difference of time-series

Figure 6-2 showed the first order difference of female ASPR time-series. Obviously, it was not stationary. After performing the second order difference (Figure 6-3), we found that the time-series was not still stationary (Figure 6-4, *adf.test*). We selected optimal ARIMA parameters (p, d, q) based on AIC and BIC.

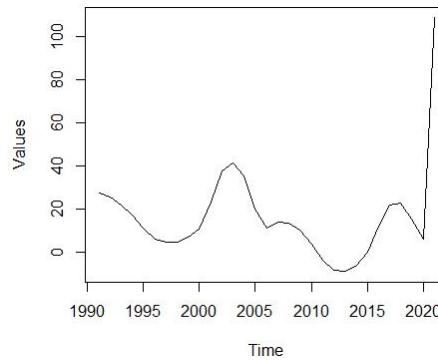

Figure 6-2 The first order difference of female ASPR time-series

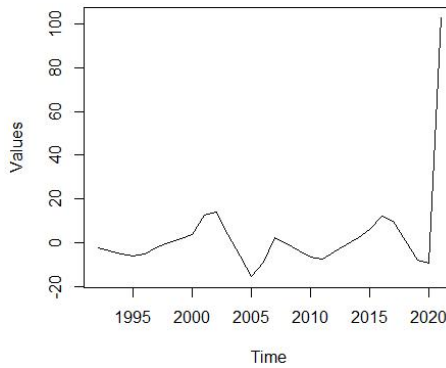

Figure 6-3 The second order difference of female ASPR time-series

```

Augmented Dickey-Fuller Test
alternative: stationary

Type 1: no drift no trend
      lag    ADF p.value
[1,]    0 -1.815  0.0693
[2,]    1 -2.159  0.0331
[3,]    2 -0.732  0.4083
[4,]    3 -0.221  0.5726
Type 2: with drift no trend
      lag    ADF p.value
[1,]    0 -1.711  0.435
[2,]    1 -2.066  0.306
[3,]    2 -0.655  0.804
[4,]    3 -0.139  0.932
Type 3: with drift and trend
      lag    ADF p.value
[1,]    0 -1.870  0.610
[2,]    1 -2.373  0.415
[3,]    2 -0.980  0.926
[4,]    3 -0.414  0.979
----
Note: in fact, p.value = 0.01 means p.value <= 0.01

```

Figure 6-4 Time-series stationarity test after the second order difference

### 6.3 White noise test and draw ACF and PACF plots

We used “Box-Ljung” method to perform white noise test. White noise test results showed  $P$  values were 0.9986 for “lag=6” and 0.9999 for “lag=12” (Figure 6-5). We drew ACF and PACF plots for time-series (Figure 6-6 and Figure 6-7).

```

> Box.test(values_diff,lag=6,type='Ljung-Box')

Box-Ljung test

data: values_diff
X-squared = 0.43332, df = 6, p-value = 0.9986

> Box.test(values_diff,lag=12,type='Ljung-Box')

Box-Ljung test

data: values_diff
X-squared = 1.2702, df = 12, p-value = 0.9999

```

Figure 6-5 White noise test for time-series

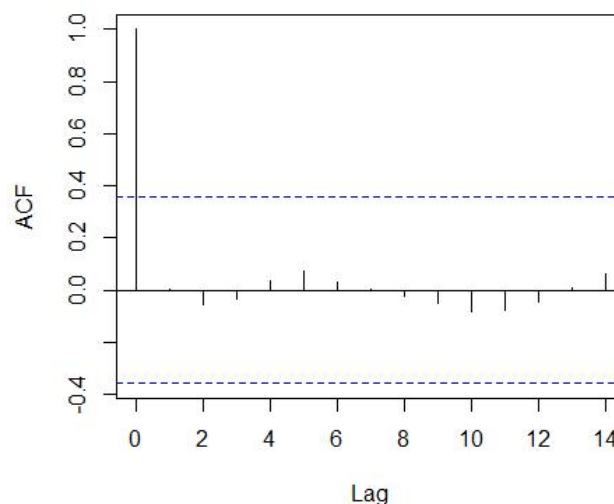

Figure 6-6 ACF plot for time-series

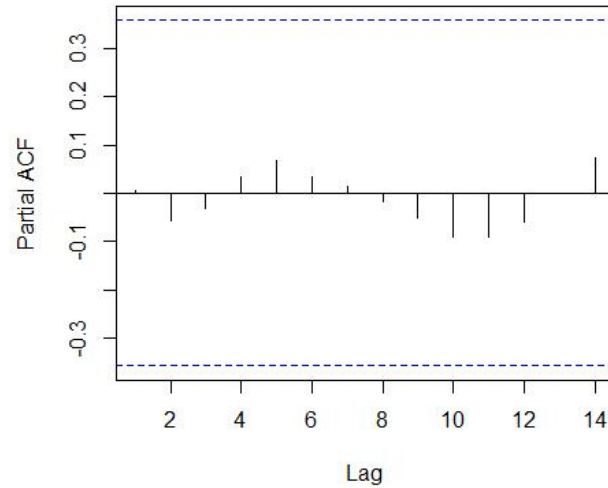

Figure 6-7 PACF plot for time-series

#### 6.4 ARIMA model constructing

We selected optimal ARIMA parameters ( $p, d, q$ ) based on Akaike information criterion (AIC) and Bayesian information criterion (BIC). The results of selecting ARIMA parameters were showed in table 6-1.

Table 6-1 The results of selecting ARIMA parameters

| Models       | AIC      | BIC      |
|--------------|----------|----------|
| ARIMA(1,2,0) | 268.6874 | 271.4898 |
| ARIMA(1,2,1) | -        | -        |
| ARIMA(1,2,2) | -        | -        |
| ARIMA(2,2,0) | 269.9579 | 274.1615 |
| ARIMA(2,2,1) | -        | -        |
| ARIMA(2,2,2) | -        | -        |

From table 6-1, we observed that there was lower AIC and BIC in ARIMA(1,2,0) model. Therefore, we chose ARIMA(1,2,0) model to fit the female ASPR data.

#### 6.5 White noise test for residual

From figure 6-8, we found that residuals were white noise sequence (All  $P > 0.05$ , Bottom Left). Therefore, the ARIMA(1,2,0) model was successful and reliable.



### Residual Diagnostics Plots

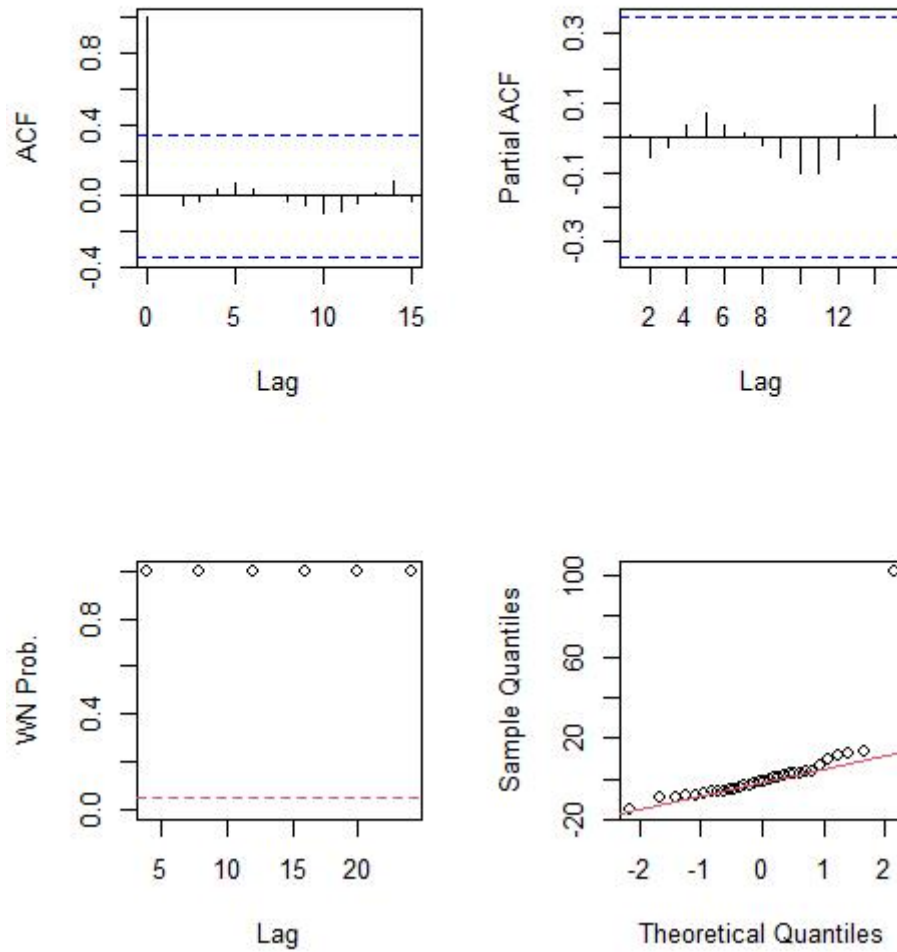

Figure 6-8 ARIMA(1,2,0) model test

## 7 Predict the total ASMR based on ARIMA model

### 7.1 Total ASMR time-series plot

The total ASMR trend from 1990 to 2021 was showed in figure 7-1.

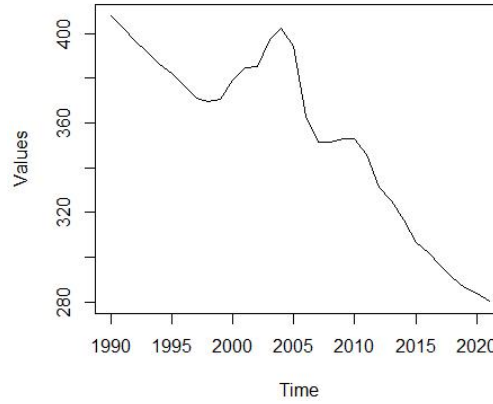

Figure 7-1 Total ASMR time-series trend plot

### 7.2 Difference of time-series

Figure 7-2 showed the first order difference of total ASMR time-series. Based on this, we further performed the second order difference (Figure 7-3). we found that the second order difference was more stationary than the first order difference. Time-series stationarity test after the second order difference was showed in figure 7-4 (*adf.test*).

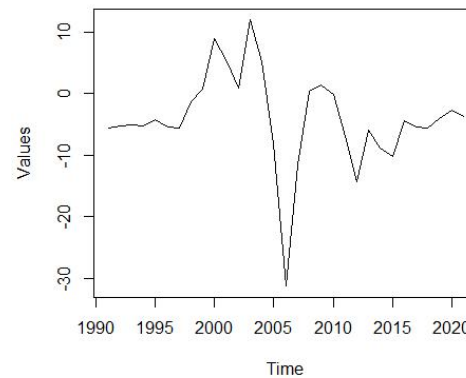

Figure 7-2 The first order difference of total ASMR time-serie

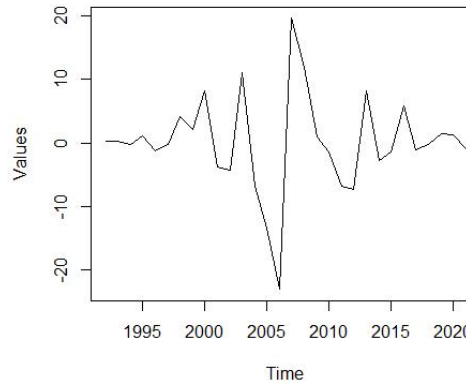

Figure 7-3 The second order difference of total ASMR time-serie

```

Augmented Dickey-Fuller Test
alternative: stationary

Type 1: no drift no trend
lag    ADF p.value
[1,]   0 -5.15   0.01
[2,]   1 -5.14   0.01
[3,]   2 -4.63   0.01
[4,]   3 -3.78   0.01
Type 2: with drift no trend
lag    ADF p.value
[1,]   0 -5.06  0.0100
[2,]   1 -5.04  0.0100
[3,]   2 -4.53  0.0100
[4,]   3 -3.69  0.0112
Type 3: with drift and trend
lag    ADF p.value
[1,]   0 -4.96  0.0100
[2,]   1 -4.94  0.0100
[3,]   2 -4.43  0.0100
[4,]   3 -3.60  0.0486
----
Note: in fact, p.value = 0.01 means p.value <= 0.01

```

Figure 7-4 Time-series stationarity test after the second order difference

### 7.3 White noise test and draw ACF and PACF plots

We used “Box-Ljung” method to perform white noise test. White noise test results showed  $P$  values were 0.3156 for “lag=6” and 0.7391 for “lag=12” (Figure 7-5). We drew ACF and PACF plots for time-series (Figure 7-6 and Figure 7-7).

```

> Box.test(values_diff,lag=6,type='Ljung-Box')

Box-Ljung test

data: values_diff
X-squared = 7.0567, df = 6, p-value = 0.3156

> Box.test(values_diff,lag=12,type='Ljung-Box')

Box-Ljung test

data: values_diff
X-squared = 8.5709, df = 12, p-value = 0.7391

```

Figure 7-5 White noise test for stationary time-series

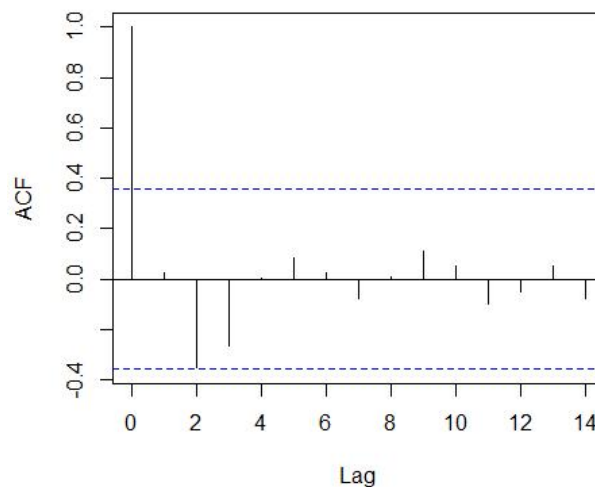

Figure 7-6 ACF plot for time-series

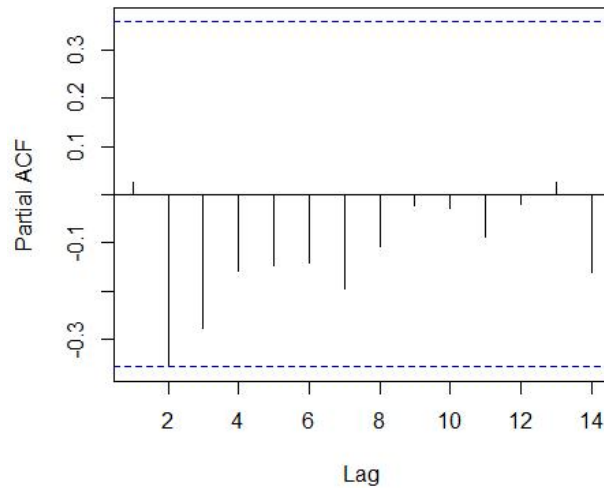

Figure 7-7 PACF plot for time-series

#### 7.4 ARIMA model constructing

We selected optimal ARIMA parameters ( $p, d, q$ ) based on Akaike information criterion (AIC) and Bayesian information criterion (BIC). The results of selecting ARIMA parameters were showed in table 7-1.

Table 7-1 The results of selecting ARIMA parameters

| Models       | AIC      | BIC      |
|--------------|----------|----------|
| ARIMA(1,2,0) | 211.1609 | 213.9633 |
| ARIMA(1,2,1) | 212.6816 | 216.8852 |
| ARIMA(1,2,2) | 205.9011 | 211.5059 |
| ARIMA(2,2,0) | 209.4173 | 213.6209 |
| ARIMA(2,2,1) | 205.0152 | 210.6200 |
| ARIMA(2,2,2) | 207.0056 | 214.0116 |

From table 7-1, we observed that there was lower AIC and BIC in ARIMA(2,2,1) model. Therefore, we chose ARIMA(2,2,1) model to fit the total ASMR data.

#### 7.5 White noise test for residual

From figure 7-8, we found that residuals were white noise sequence (All  $P > 0.05$ , Bottom Left). Therefore, the ARIMA(2,2,1) model was successful and reliable.

### Residual Diagnostics Plots

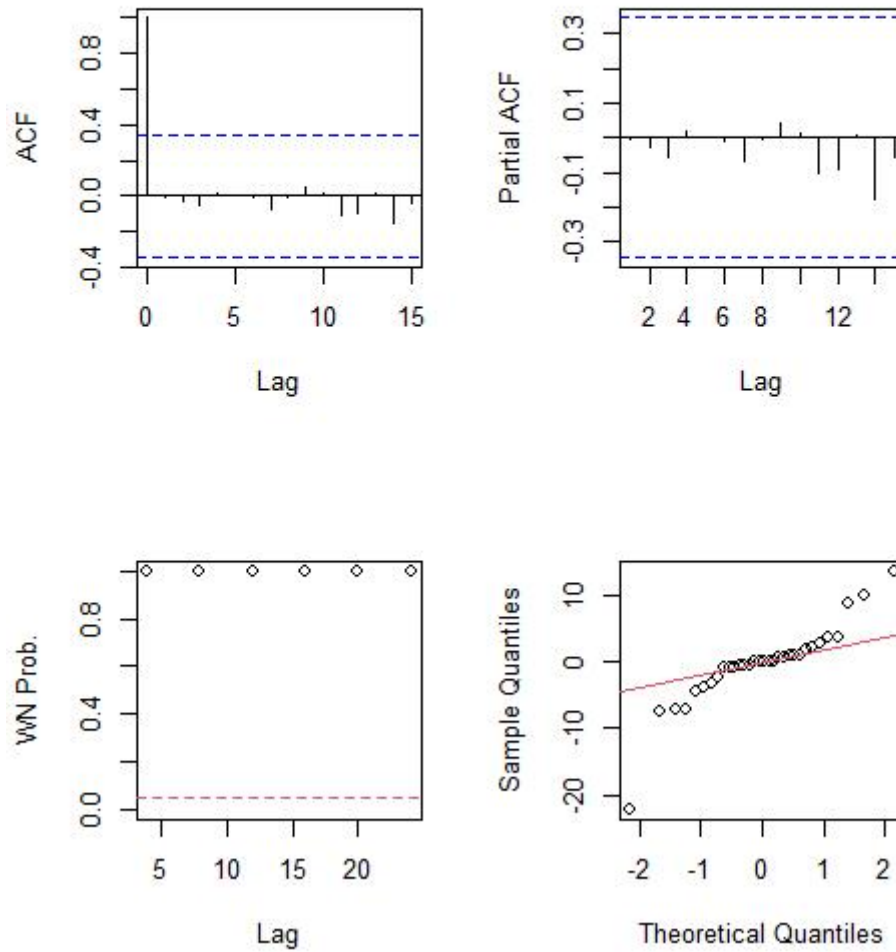

Figure 7-8 ARIMA(2,2,1) model test

## 8 Predict the male ASMR based on ARIMA model

### 8.1 Male ASMR time-series plot

The male ASMR trend from 1990 to 2021 was showed in figure 8-1.

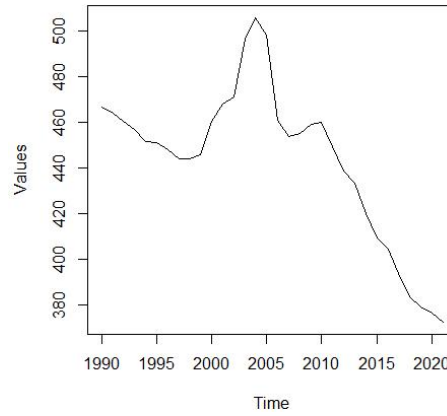

Figure 8-1 Male ASMR time-series trend plot

### 8.2 Difference of time-series

Figure 8-2 showed the first order difference of male ASMR time-series. Based on this, we further performed the second order difference (Figure 8-3). we found that the second order difference was more stationary than the first order difference. Time-series stationarity test after the second order difference was showed in figure 8-4 (*adf.test*).

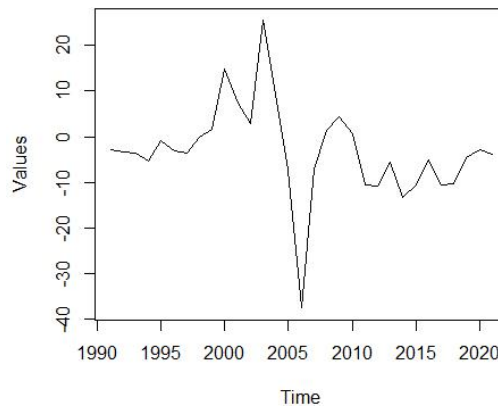

Figure 8-2 The first order difference of male ASMR time-serie

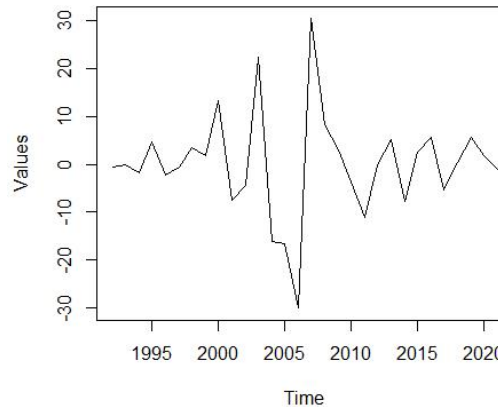

Figure 8-3 The second order difference of male ASMR time-serie

```

Augmented Dickey-Fuller Test
alternative: stationary

Type 1: no drift no trend
lag ADF p.value
[1,] 0 -5.96 0.01
[2,] 1 -5.00 0.01
[3,] 2 -5.09 0.01
[4,] 3 -3.83 0.01
Type 2: with drift no trend
lag ADF p.value
[1,] 0 -5.85 0.01
[2,] 1 -4.90 0.01
[3,] 2 -4.98 0.01
[4,] 3 -3.75 0.01
Type 3: with drift and trend
lag ADF p.value
[1,] 0 -5.74 0.0100
[2,] 1 -4.80 0.0100
[3,] 2 -4.88 0.0100
[4,] 3 -3.65 0.0449
---
Note: in fact, p.value = 0.01 means p.value <= 0.01

```

Figure 8-4 Time-series stationarity test after the second order difference

### 8.3 White noise test and draw ACF and PACF plots

We used “Box-Ljung” method to perform white noise test. White noise test results showed  $P$  values were 0.3727 for “lag=6” and 0.7765 for “lag=12” (Figure 8-5). We drew ACF and PACF plots for time-series (Figure 8-6 and Figure 8-7).

```

> Box.test(values_diff,lag=6,type='Ljung-Box')

Box-Ljung test

data: values_diff
X-squared = 6.4691, df = 6, p-value = 0.3727

> Box.test(values_diff,lag=12,type='Ljung-Box')

Box-Ljung test

data: values_diff
X-squared = 8.1101, df = 12, p-value = 0.7765

```

Figure 8-5 White noise test for stationary time-series

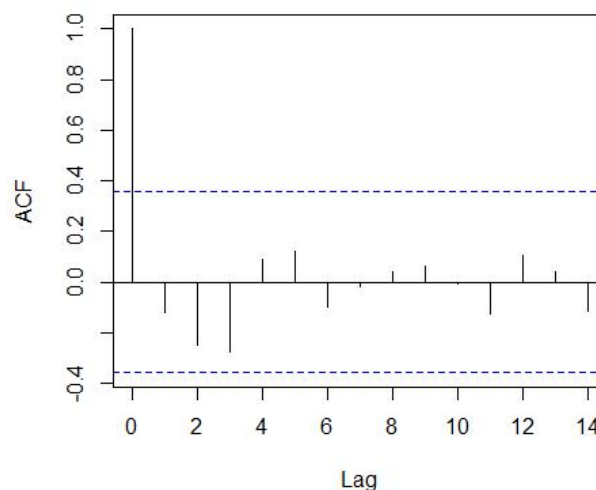

Figure 8-6 ACF plot for time-series

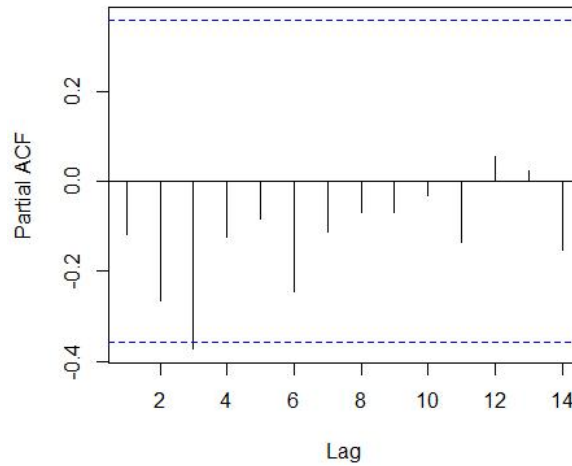

Figure 8-7 PACF plot for time-series

#### 8.4 ARIMA model constructing

We selected optimal ARIMA parameters ( $p, d, q$ ) based on Akaike information criterion (AIC) and Bayesian information criterion (BIC). The results of selecting ARIMA parameters were showed in table 8-1.

Table 8-1 The results of selecting ARIMA parameters

| Models       | AIC      | BIC      |
|--------------|----------|----------|
| ARIMA(1,2,0) | 232.2933 | 235.0957 |
| ARIMA(1,2,1) | 227.2654 | 231.4690 |
| ARIMA(1,2,2) | 228.4488 | 234.0535 |
| ARIMA(2,2,0) | 232.2557 | 236.4593 |
| ARIMA(2,2,1) | 228.0164 | 233.6212 |
| ARIMA(2,2,2) | 229.9487 | 236.9547 |

From table 8-1, we observed that there was lower AIC and BIC in ARIMA(1,2,1) model. Therefore, we chose ARIMA(1,2,1) model to fit the male ASMR data.

#### 8.5 White noise test for residual

From figure 8-8, we found that residuals were white noise sequence (All  $P > 0.05$ , Bottom Left). Therefore, the ARIMA(1,2,1) model was successful and reliable.



### Residual Diagnostics Plots

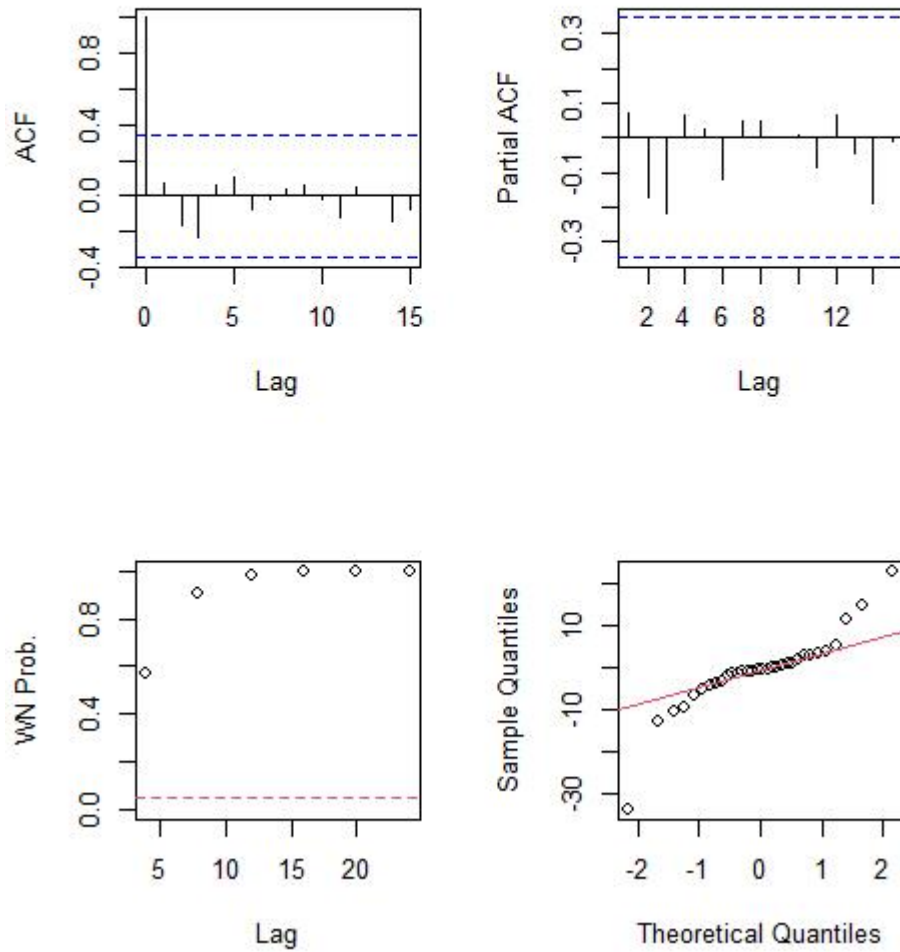

Figure 8-8 ARIMA(1,2,1) model test

## 9 Predict the female ASMR based on ARIMA model

### 9.1 Female ASMR time-series plot

The female ASMR trend from 1990 to 2021 was showed in figure 9-1.

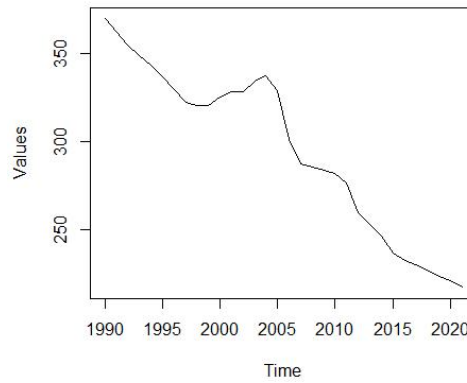

Figure 9-1 Female ASMR time-series trend plot

### 9.2 Difference of time-series

Figure 9-2 showed the first order difference of female ASMR time-series. Based on this, we further performed the second order difference (Figure 9-3). we found that the second order difference was more stationary than the first order difference. Time-series stationarity test after the second order difference was showed in figure 9-4 (*adf.test*).

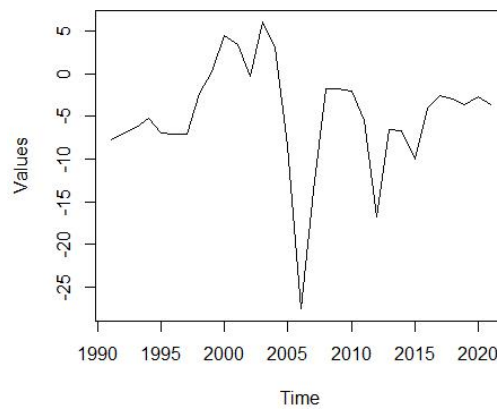

Figure 9-2 The first order difference of female ASMR time-serie

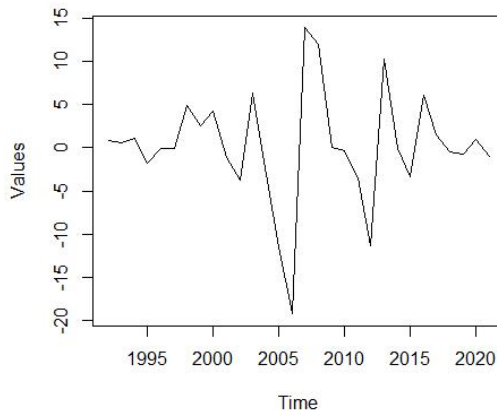

Figure 9-3 The second order difference of female ASMR time-serie

```

Augmented Dickey-Fuller Test
alternative: stationary

Type 1: no drift no trend
lag ADF p.value
[1,] 0 -5.11 0.01
[2,] 1 -5.30 0.01
[3,] 2 -4.13 0.01
[4,] 3 -3.92 0.01
Type 2: with drift no trend
lag ADF p.value
[1,] 0 -5.02 0.01
[2,] 1 -5.20 0.01
[3,] 2 -4.05 0.01
[4,] 3 -3.83 0.01
Type 3: with drift and trend
lag ADF p.value
[1,] 0 -4.93 0.0100
[2,] 1 -5.09 0.0100
[3,] 2 -3.96 0.0238
[4,] 3 -3.74 0.0385
-----
Note: in fact, p.value = 0.01 means p.value <= 0.01

```

Figure 9-4 Time-series stationarity test after the second order difference

### 9.3 White noise test and draw ACF and PACF plots

We used “Box-Ljung” method to perform white noise test. White noise test results showed  $P$  values were 0.2865 for “lag=6” and 0.5048 for “lag=12” (Figure 9-5). We drew ACF and PACF plots for time-series (Figure 9-6 and Figure 9-7).

```

> Box.test(values_diff,lag=6,type='Ljung-Box')

Box-Ljung test

data: values_diff
x-squared = 7.3869, df = 6, p-value = 0.2865

> Box.test(values_diff,lag=12,type='Ljung-Box')

Box-Ljung test

data: values_diff
x-squared = 11.284, df = 12, p-value = 0.5048

```

Figure 9-5 White noise test for stationary time-series

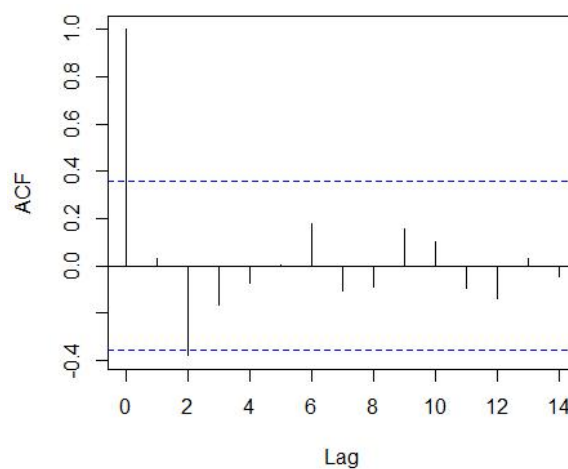

Figure 9-6 ACF plot for time-series

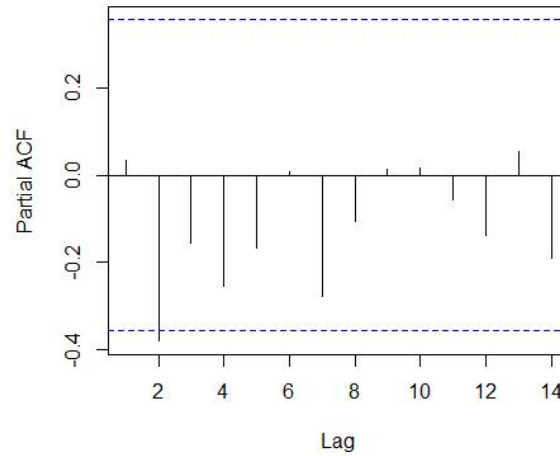

Figure 9-7 PACF plot for time-series

#### 9.4 ARIMA model constructing

We selected optimal ARIMA parameters (p, d, q) based on Akaike information criterion (AIC) and Bayesian information criterion (BIC). The results of selecting ARIMA parameters were showed in table 9-1.

Table 9-1 The results of selecting ARIMA parameters

| Models       | AIC      | BIC      |
|--------------|----------|----------|
| ARIMA(1,2,0) | 200.9881 | 203.7905 |
| ARIMA(1,2,1) | 201.9804 | 206.1840 |
| ARIMA(1,2,2) | 195.0999 | 200.7047 |
| ARIMA(2,2,0) | 198.5590 | 202.7626 |
| ARIMA(2,2,1) | 194.9204 | 200.5252 |
| ARIMA(2,2,2) | 196.6981 | 203.7041 |

From table 9-1, we observed that there was lower AIC and BIC in ARIMA(2,2,1) model. Therefore, we chose ARIMA(2,2,1) model to fit the female ASMR data.

#### 9.5 White noise test for residual

From figure 9-8, we found that residuals were white noise sequence (All  $P > 0.05$ , Bottom Left). Therefore, the ARIMA(2,2,1) model was successful and reliable.

### Residual Diagnostics Plots

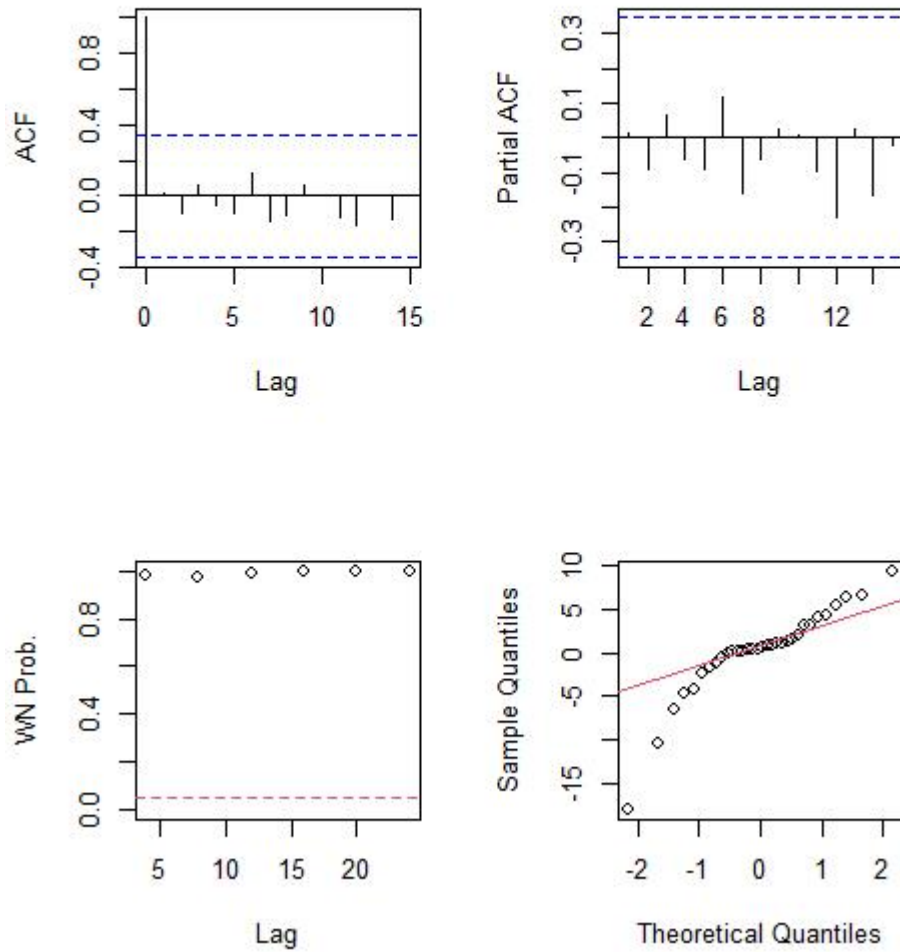

Figure 9-8 ARIMA(2,2,1) model test
